# Supplementary material for: Tightening polybenzimidazole (PBI) nanostructure via chemical cross-linking for membrane H2/CO2separation
Source: Royal Society of Chemistry journal article supplement (doi:10.1039/c7ta03874g), 2017-01-01
Supplement: c7ta03874g1.pdf [file c7ta03874g1.pdf]

Supplemental Information for

## Tightening Polybenzimidazole (PBI) Nanostructures via Chemical Cross-linking for Membrane H<sub>2</sub>/CO<sub>2</sub> Separation

Lingxiang Zhu, Mark T. Swihart and Haiqing Lin\*

Department of Chemical and Biological Engineering, University at Buffalo, The State University of New York, Buffalo, NY 14260, USA

\* Corresponding author. Tel: +1-716-645-1856, Email: [haiqingl@buffalo.edu](mailto:haiqingl@buffalo.edu) (H. Lin)

### Cross-linking of PBI Using TCL

The cross-linking agent, terephthaloyl chloride (TCL), can rapidly react with the secondary amine groups in polybenzimidazole (PBI). As shown in **Fig. S1**, the reaction was monitored when dilute TCL solution that contains 0.01 mol L<sup>-1</sup>TCL in dimethylacetamide (DMAc) was gradually added into 0.5 wt.% PBI/DMAc solutions. Insoluble gel was observed at 66 millisecond (ms) after TCL were added.

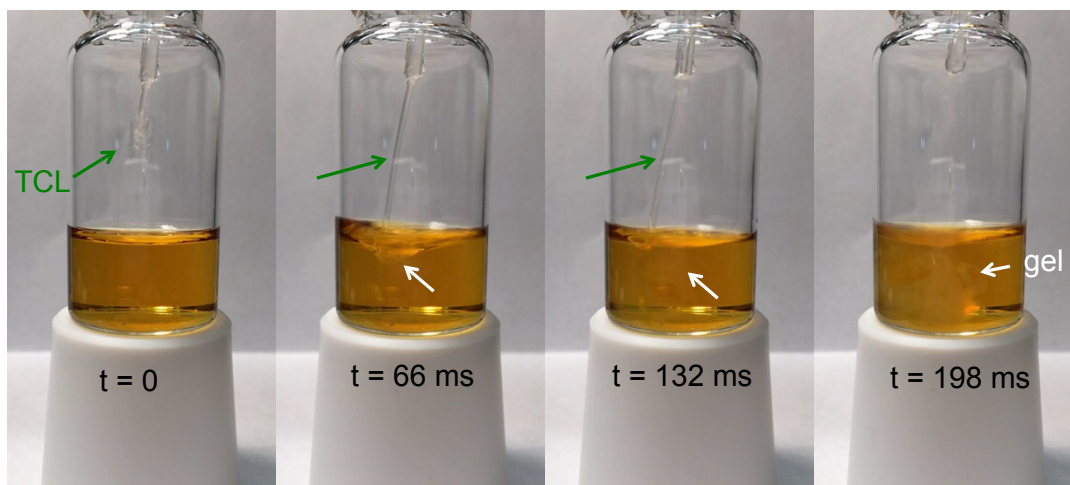

**Fig. S1** Photographs of the reaction between TCL and PBI by adding 0.01 mol L<sup>-1</sup> TCL solution into 0.5 wt.% PBI solution at room temperature. Gels are formed after 66 ms.

### Kinetic of THF Sorption in PBI

The sorption of a solvent in glassy polymeric films typically follows two steps: (1) Fickian sorption, which is typically characterized by an approximately linear section at the initial stage of sorption; (2) non-Fickian sorption that is further contributed by the relaxation of the polymeric matrix.<sup>1, 2</sup> In this study, the sorption of THF in PBI was measured by immersing 12- $\mu$ m-thick PBI films in THF and monitoring the mass change of the PBI films at varying immersion times. The mass uptake of THF by the PBI at an emersion time of  $t$  is defined as  $M_t$ , and the equilibrium mass update is denoted as  $M_\infty$ . **Fig. S2** plots the values of  $M_t/M_\infty$  as a function of the

square root of immersion time ( $t^{1/2}$ ), showing that  $M_t/M_\infty$  and  $t^{1/2}$  has a linear relationship until  $t^{1/2}$  equals to around  $11 \text{ min}^{1/2}$  (*i.e.*  $t = 121 \text{ min}$ ). This indicates the PBI films began to relax after the immersion of 2 hrs, and then the sorption follows non-Fickian behavior.

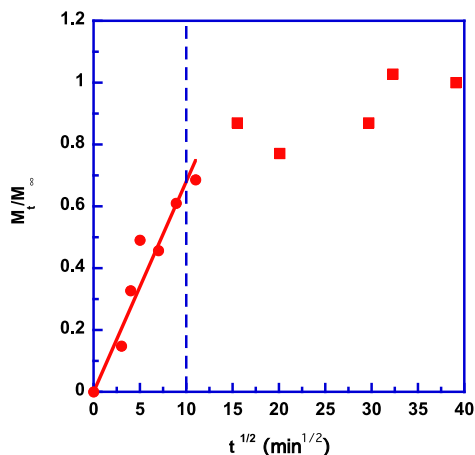

**Fig. S2** Swelling test of 12- $\mu\text{m}$ -thick PBI films in THF.  $M_t$  is the mass of THF sorbed by the PBI at an immersion time of  $t$ , and  $M_\infty$  is the equilibrium mass uptake in the sorption experiment.

### Cross-linking of PBI Using Malonyl Chloride

The 12- $\mu\text{m}$ -thick PBI films were also cross-linked using malonyl chloride (MCL). All the cross-linking procedures are the same as those used for TCL. **Fig. S3** shows pure-gas  $\text{H}_2$  and  $\text{CO}_2$  permeability and  $\text{H}_2/\text{CO}_2$  selectivity at  $35^\circ\text{C}$  as a function of the cross-linking time. Both  $\text{H}_2$  and  $\text{CO}_2$  permeability decreases with increasing the cross-linking time, while the  $\text{H}_2/\text{CO}_2$  selectivity increases initially from 12 to 21 as the cross-linking time increases to 6 hrs, and then decreases to 16 after 24-hr cross-linking. These behaviors are similar to PBI cross-linked with TCL. Additionally, these PBI cross-linked by MCL shows the highest  $\text{H}_2/\text{CO}_2$  selectivity (21) at 6-hr cross-linking, which is the same as those cross-linked with TCL.

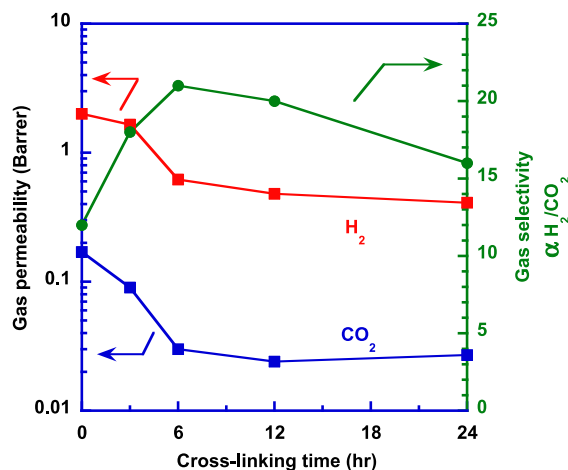

**Fig. S3.** Effect of the cross-linking time on  $\text{H}_2/\text{CO}_2$  separation properties at  $35^\circ\text{C}$  in the PBI films cross-linked using MCL.

## Effect of Temperature on Gas Permeability

The effect of temperature on pure-gas permeation in PBI and XLPBI-6H (cross-linked with TCL) is modeled using Arrhenius equation (cf. eqn (11) in manuscript), and **Table S1** summarizes the fitting parameters of pre-exponential factor ( $P_{A,0}$ ) and activation energy ( $E_p$ ).

**Table S1** Pre-exponential factor and activation energy for pure-gas permeability in PBI and XLPBI-6H.

|          | H <sub>2</sub>     |                               | CO <sub>2</sub>    |                               |
|----------|--------------------|-------------------------------|--------------------|-------------------------------|
|          | $P_{A,0}$ (Barrer) | $E_p$ (kJ mol <sup>-1</sup> ) | $P_{A,0}$ (Barrer) | $E_p$ (kJ mol <sup>-1</sup> ) |
| PBI      | 18,000             | 23.1                          | 770                | 21.4                          |
| XLPBI-6H | 54,000             | 27.8                          | 2,240              | 27.6                          |

## References:

1. C. C. McDowell, B. D. Freeman and G. W. McNeely, *Polymer*, 1999, **40**, 3487-3499.
2. G. M. Shi, H. Chen, Y. C. Jean and T. S. Chung, *Polymer*, 2013, **54**, 774-783.
